# Supplementary material for: Chlorophyll Fluorescence and Reflectance-Based Non-Invasive Quantification of Blast, Bacterial Blight and Drought Stresses in Rice
Source: Oxford University Press journal article supplement (doi:10.1093/pcp/pcx144), 2017-09-18

**SUPPLEMETARY DATA**

**Supplementary data Fig. S1** Chlorophyll a (Chl-a) concentration for NIL`s (panel A) and selected rice cultivars (panel B), for rice blast experiment; control (white) and rice blast (black columns) stress is presented at 15DAI.

**
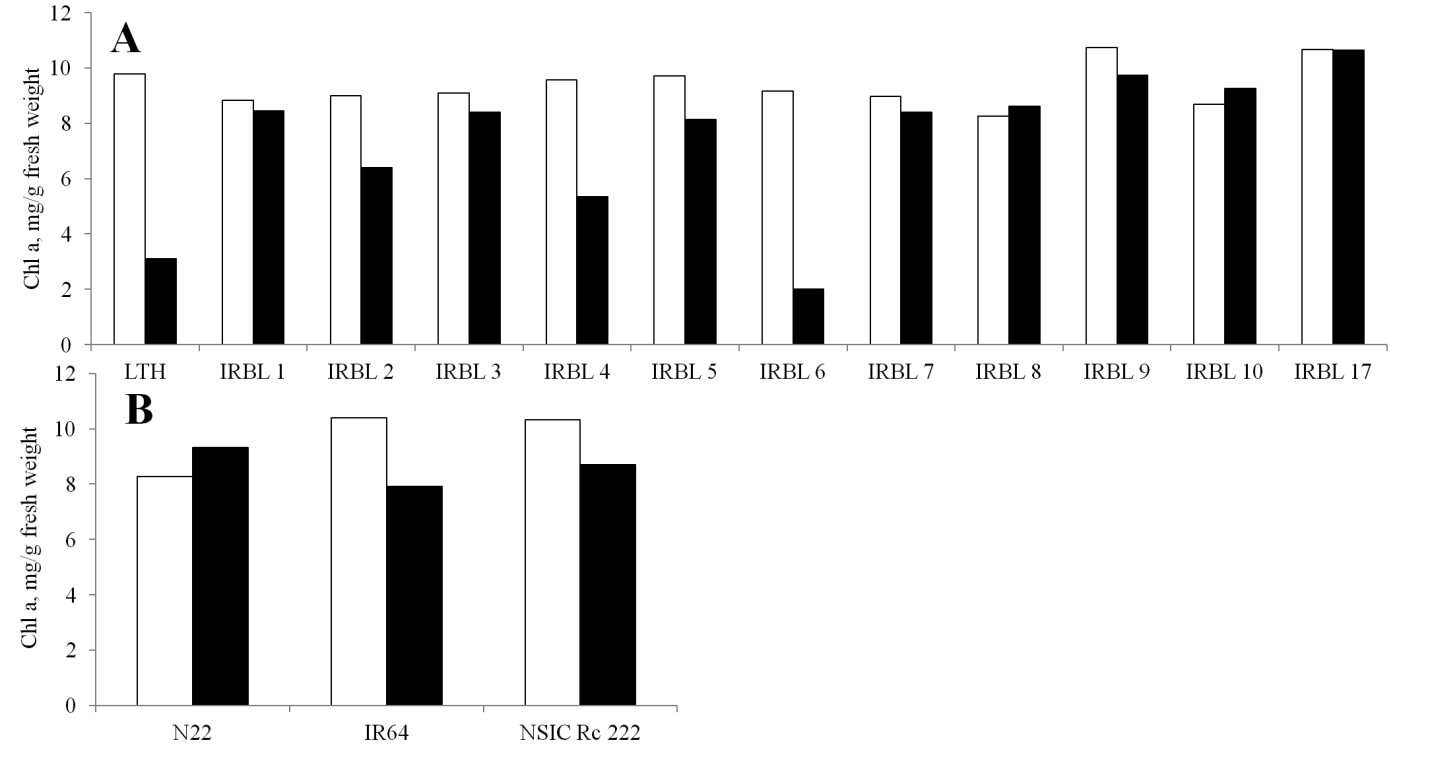
**

**Supplementary data Fig. S2** Time trend of false color scale images (FV/FM) for rice blast experiment. Distribution of selected parameter over representative healthy (upper panel) and infected (bottom panel) leaves. Values are presented for the time point between occurrence of the visible symptoms (7-9 DAI), and inspected date (15DAI). The color scale with minimum and maximum values is represented by interval (0.40-0.85).


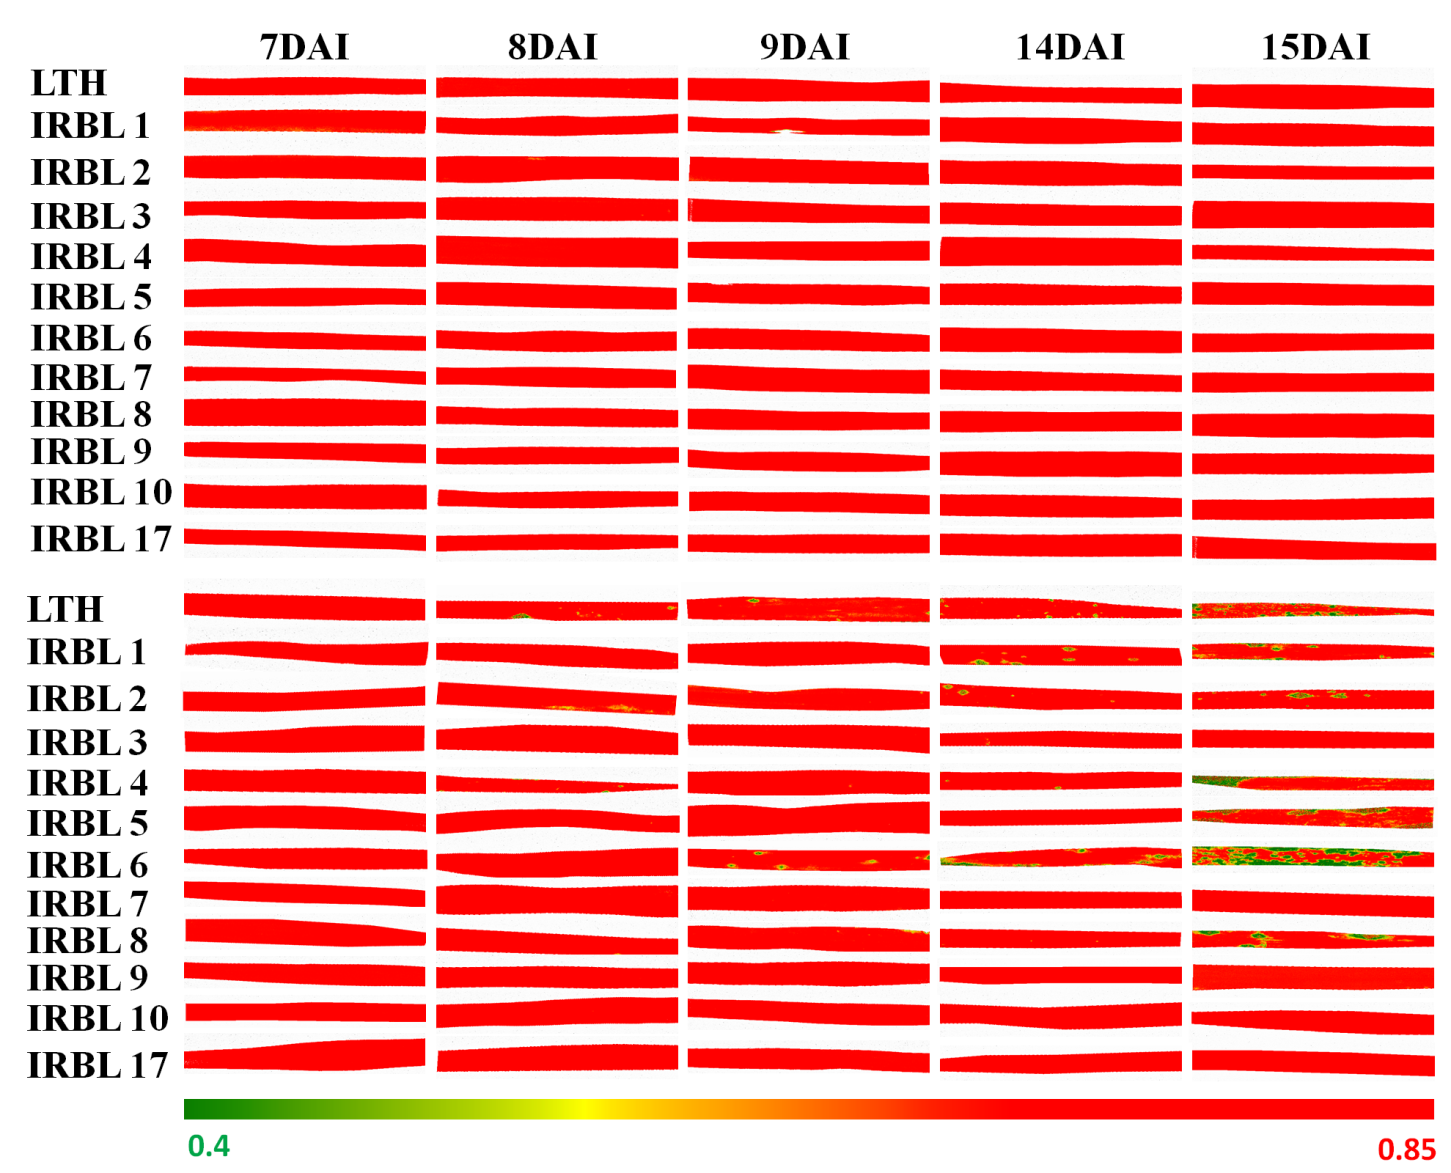


**Supplementary data Fig. S3** Time trend of false color scale images (FV/FM) for bacterial blight experiment. Distribution of selected parameter over representative control (water, upper panel) and infected (*PXO61* and *PXO99* strains) leaves. Values are presented from 0 to 7 DAI. The color scale with minimum and maximum values is represented by interval (0.40-0.85), for three representative rice genotypes knowing for their response to drought (N22, IR64 and NSIC Rc 222).


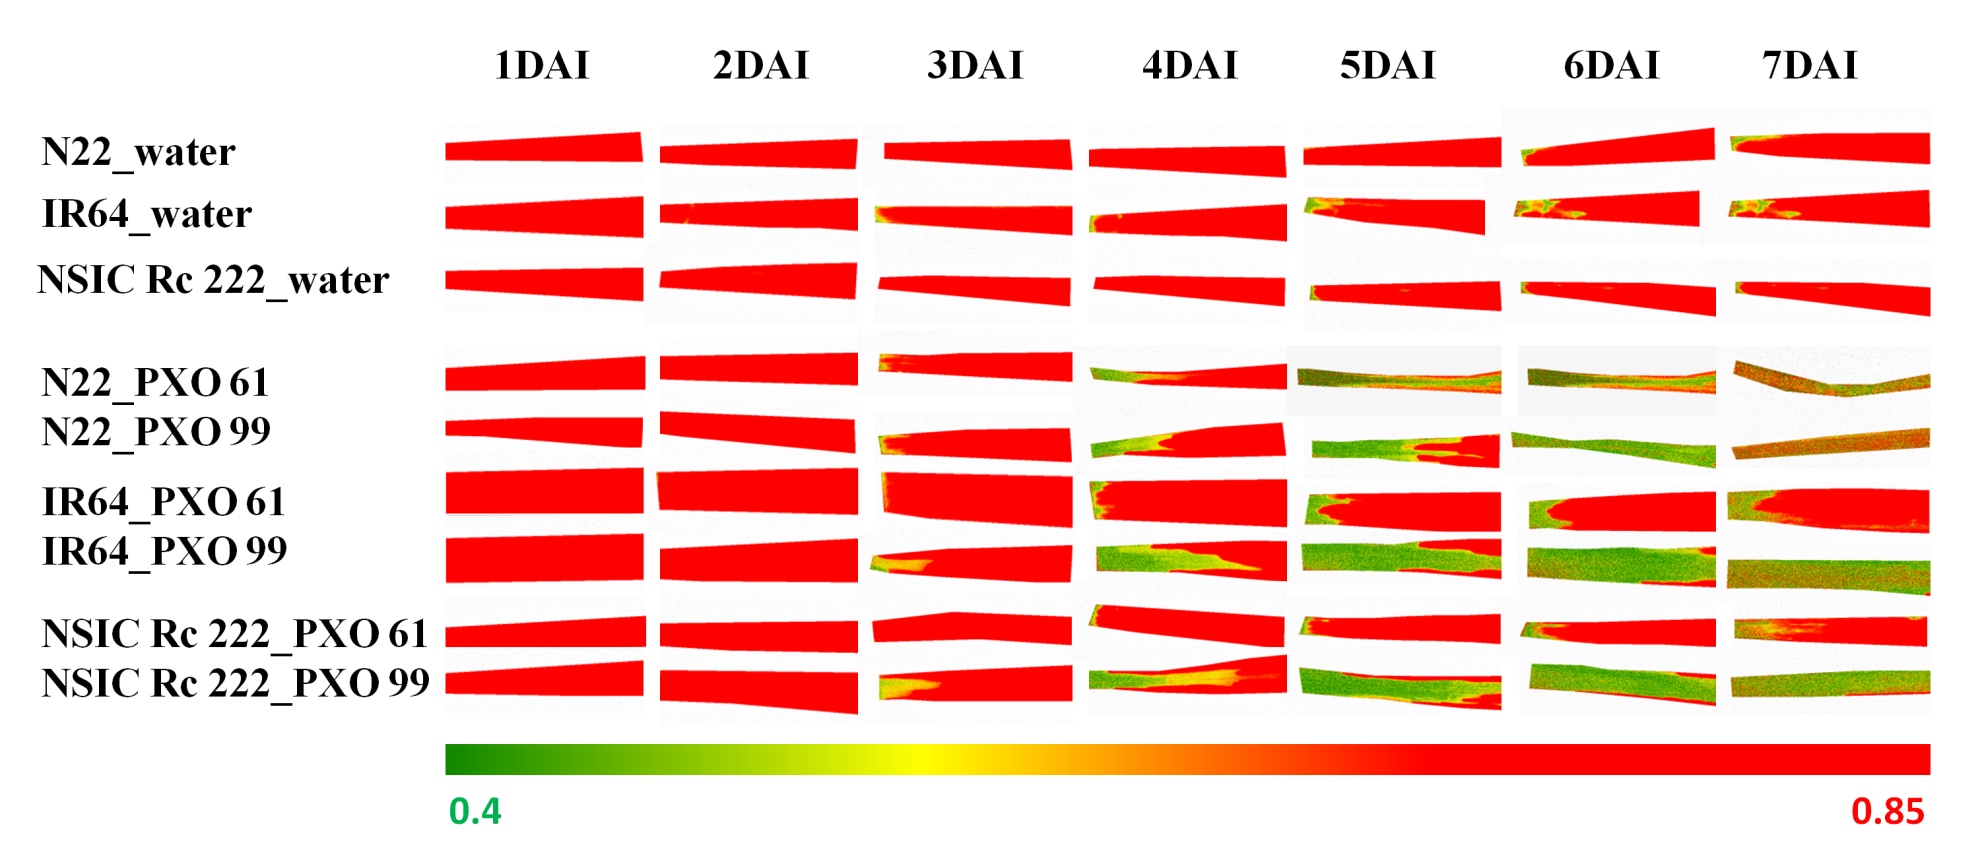


**Supplementary data Fig. S4** Mean valuesof *(1)* effective quantum yield of photosystem II efficiency in light adapted state [QY_LSS, panel A, B], and *(2)* steady state chlorophyll fluorescence level in light adapted state [Ft_Lss, panel C, D], measured *in vivo* under field (panels A and C) and greenhouse (panels B and D) conditions. White columns represent controls for both treatments; for rice blast, black columns represent infected leaf spots and red diamonds represent entire leaf area surrounding the spots where the infection started to propagate. For bacterial blight, grey and black columns represent *PXO 61* and *PXO 99* strains, respectively. Each data point represents the mean ± SEM.

**
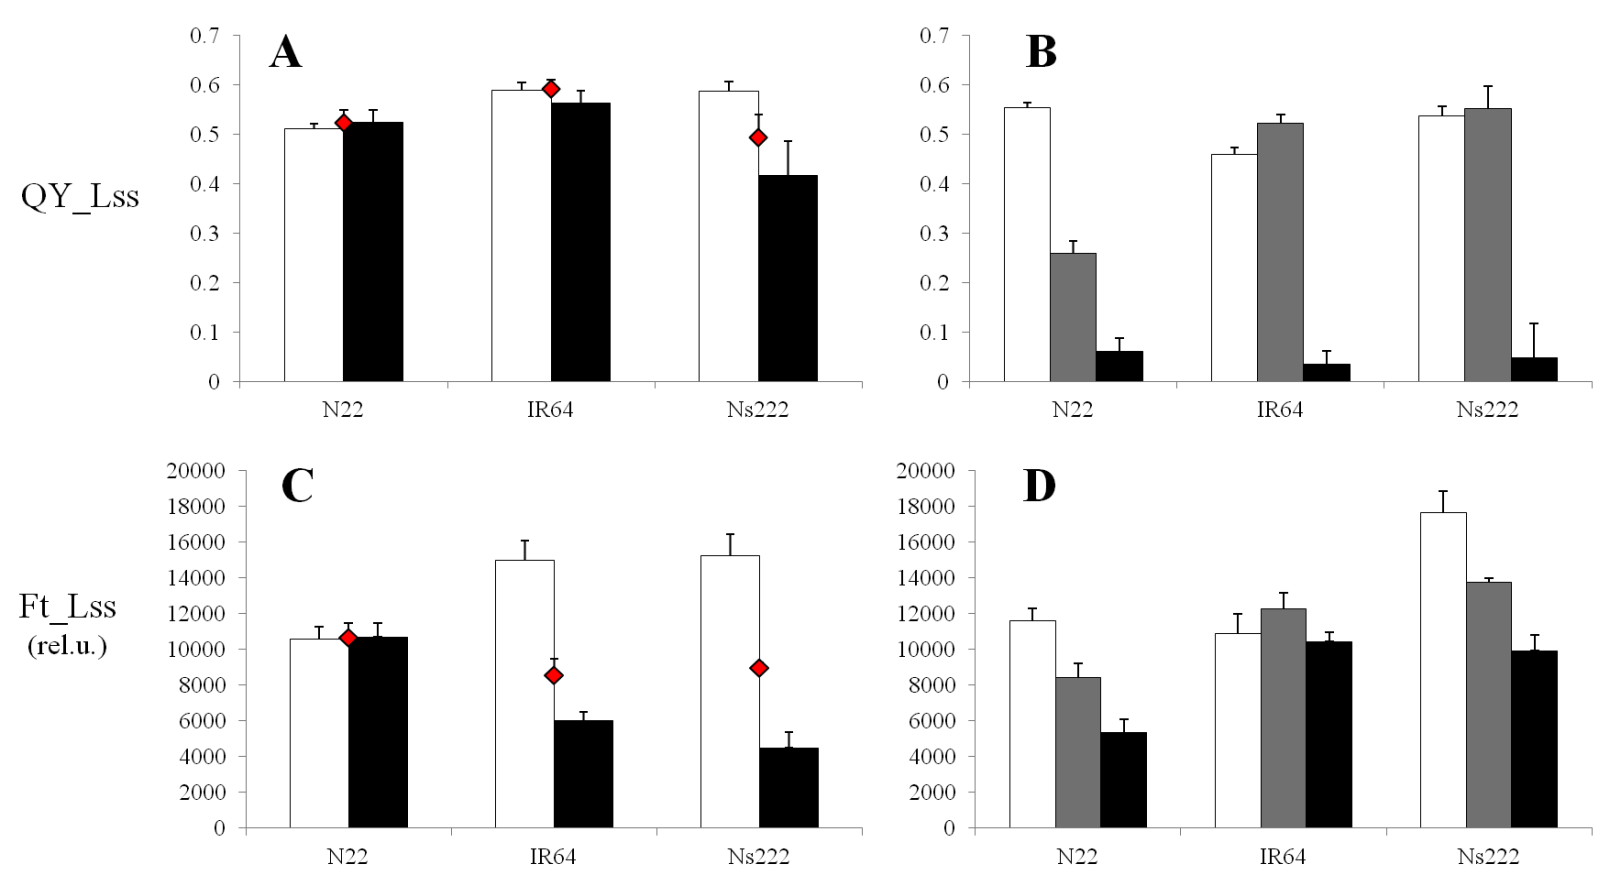
**

**Supplementary data Fig. S5** Mean valuesof *(1)* effective quantum yield of photosystem II efficiency in light adapted state [QY_LSS, upper panel], and *(2)* steady state chlorophyll fluorescence level in light adapted state [Ft_Lss, bottom panel], measured *in vivo* under greenhouse conditions. White represent control and black columns stress treatment (T) for three selected rice genotypes knowing for their contrasting response to drought. Note – Major portion of the target leaf in IR64 and NSICRc222 (Ns222) turned necrotic due to severe stress and the data presented is from the green portion towards the base of the same leaf, while N22 target leaf maintained higher greenness, allowing measurements to be taken in the middle or towards the tip of the leaf, even under severe stress demonstrating its tolerance to drought stress.

**
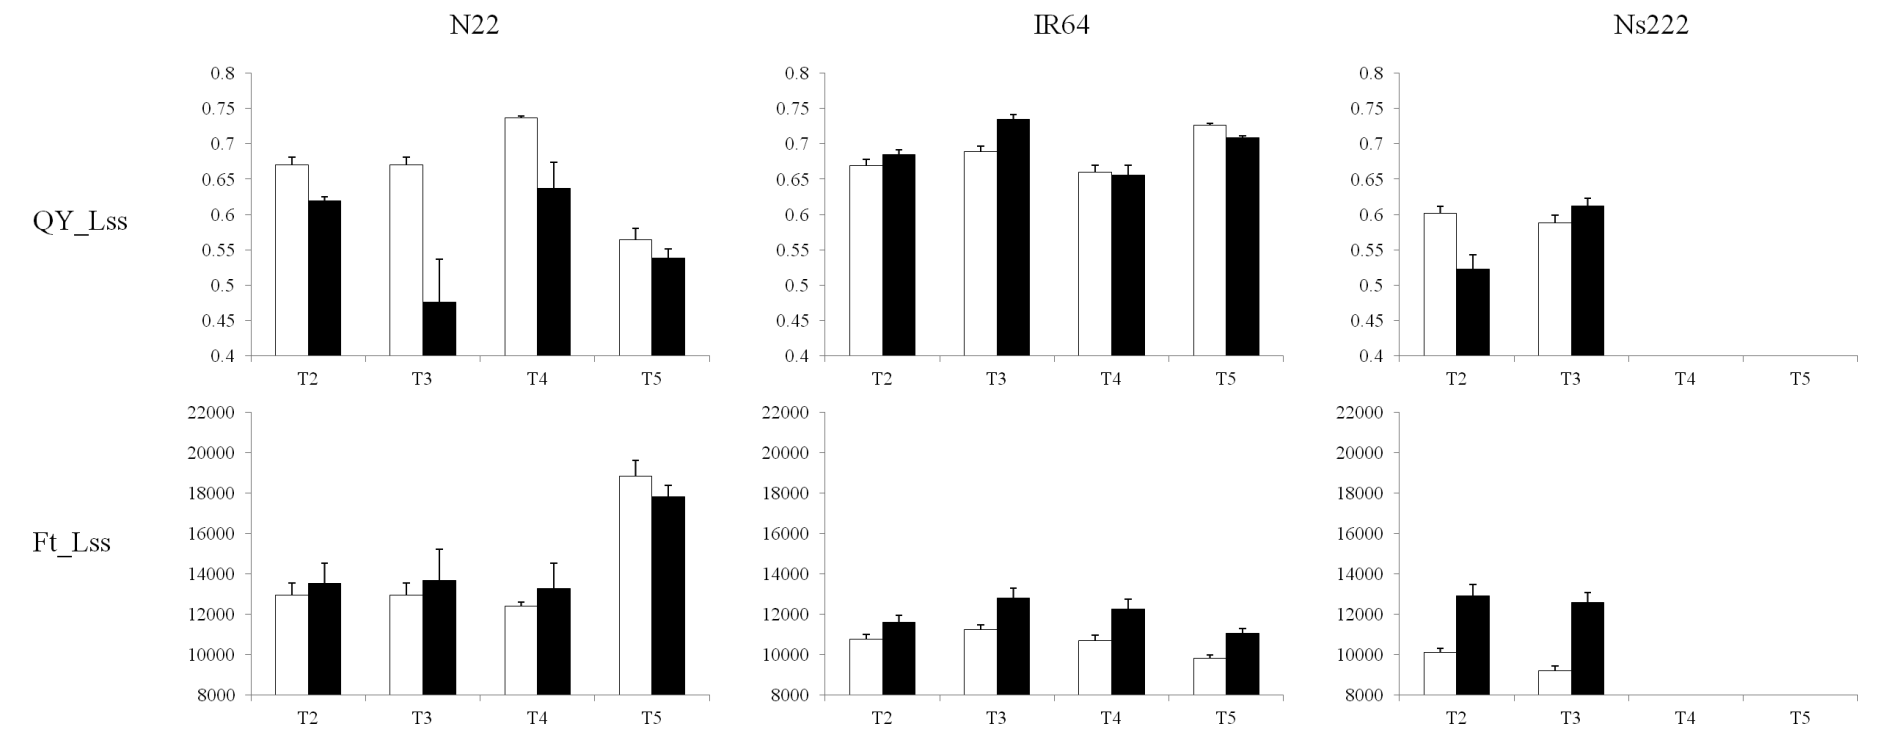
**

**Supplemetray data Fig. S6** Photographic view of experimental plots, IRRI blast nursery.


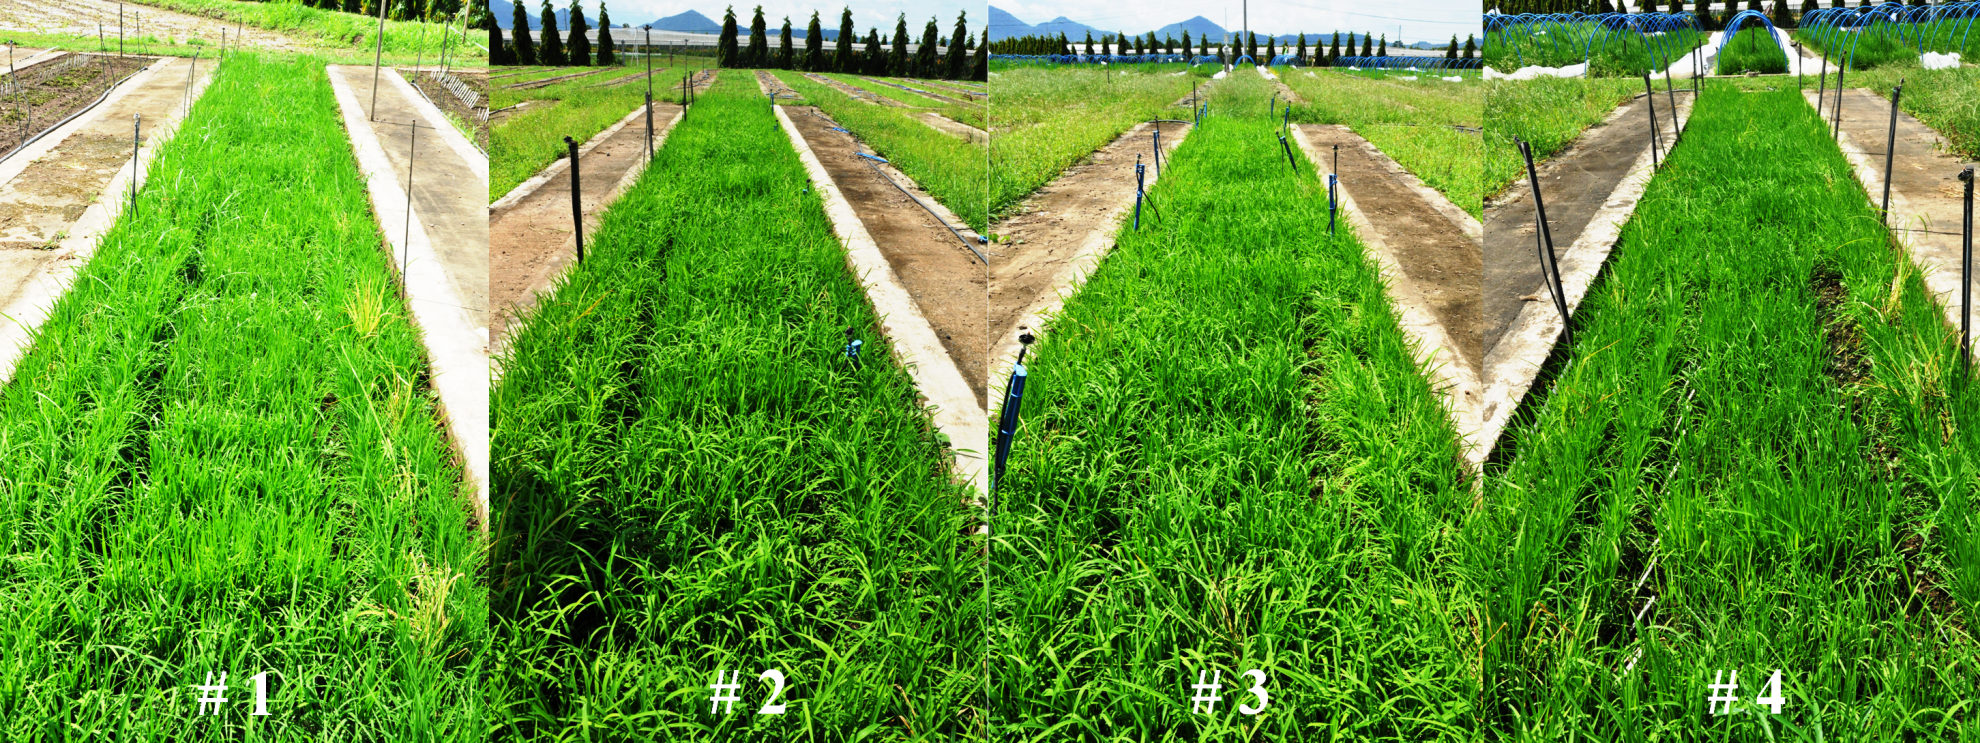


**Supplementary data Fig. S7** Optical instruments used in this study. To measure *in-vivo* chlorophyll fluorescence and/or reflectance signals, portable fluorometer FluorPen (FluorPen FP 100, panel a, left side instrument) and prototype of handheld instrument built on the platform of SpectraPen SP 100 (WinePen, panel a, right side instrument), both produced by PSI (Photon System Instruments, Ltd., Brno, Czech Republic), were employed. For specific technical information, readers are directed to

*(i)* FluorPen (http://psi.cz/products/pocket-sized-instruments/fluorpen-fp-100) and/or to

*(ii)* WinePen (http://psi.cz/products/pocket-sized-instruments/spectrapen-sp-100, www.premivm.eu).

To show the instruments in progress, FluorPen fluorescence measurement (panel b), WinePen reflectance measurement (panel c) is presented.


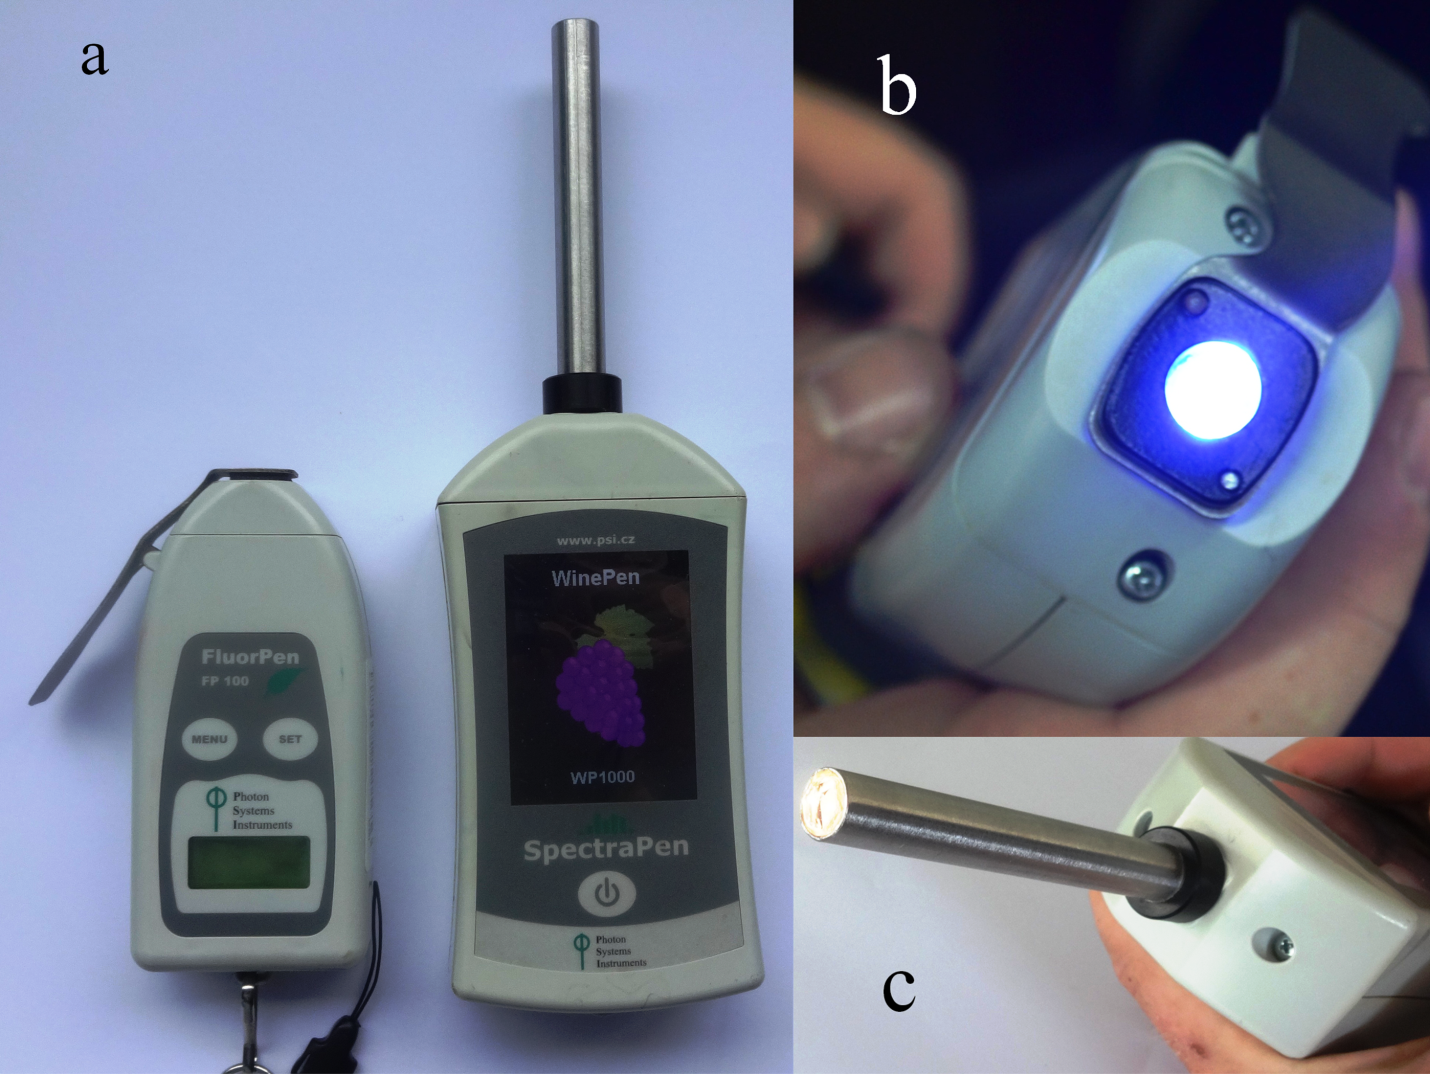

Supplement: pcx144_pcp-2017-e-00196-file009.docx [file pcx144_pcp-2017-e-00196-file009.docx]
